1 Insufficient serological evidence of the association between chronic kidney disease and leptospirosis  
2 in Badulla and Kandy districts, Sri Lanka

3

4 Regina Amanda Fonseka: Department of Microbiology, Faculty of Medicine, University of  
5 Peradeniya, 34, Galaha Road, Peradeniya 20400, Sri Lanka. E-mail: gramandafonseka@gmail.com

6 Pavani Senarathne: Department of Microbiology, Faculty of Medicine, University of Peradeniya, 34,  
7 Galaha Road, Peradeniya 20400, Sri Lanka. E-mail: pavanisenarathne@gmail.com

8 Devinda Shameera Muthusinghe: Graduate School of Infectious Diseases, Hokkaido University, Kita  
9 18, Nishi 9, Kita-ku, Sapporo, Hokkaido 060-0818, Japan. E-mail: devindasm@nagasaki-u.ac.jp

10 Nishantha Nanayakkara: Nephrology and Transplantation Unit Kandy Teaching Hospital, William  
11 Gopallawa Mawatha, Kandy 20000, Sri Lanka. E-mail: nishantha4313@gmail.com

12 Lishantha Gunaratne: Renal Unit, District Hospital, Girandurukotte, Girandurukotte 90750, Sri Lanka.  
13 E-mail: lishanthe@yahoo.co.uk

14 Kumiko Yoshimatsu: Graduate School of Infectious Diseases, Hokkaido University, Kita 18, Nishi 9,  
15 Kita-ku, Sapporo, Hokkaido 060-0818, Japan. Department of Microbiology and Immunology, Faculty  
16 of Medicine, Hokkaido University, 7 Kita 7, Nishi 15, Kita-ku, Sapporo, Hokkaido 060-0815, Japan. E-  
17 mail: yosimatu@igm.hokudai.ac.jp

18 Nobuo Koizumi: Department of Bacteriology I, National Institute of Infectious Diseases, 1-23-1  
19 Toyama, Shinjuku-ku, Tokyo 162-8640, Japan. E-mail: nkoizumi@niid.go.jp

20 Chandika Damesh Gamage: Department of Microbiology, Faculty of Medicine, University of  
21 Peradeniya, 34, Galaha Road, Peradeniya 20400, Sri Lanka. E-mail: chandika.gamage@med.pdn.ac.lk

**NOTE: This preprint reports new research that has not been certified by peer review and should not be used to guide clinical practice.**

22

23 Corresponding author: Chandika Damesh Gamage

24 **Abstract**

25 Objective

26 Chronic kidney disease (CKD) and chronic kidney disease of uncertain etiology (CKDu) are chronic  
27 kidney diseases that pose a significant health burden in Sri Lanka. Leptospirosis is a bacterial  
28 zoonosis that primarily damages renal tissues by colonization of *Leptospira* spp. in the renal tubules  
29 and is a suspected etiological agent of CKDu. Since Sri Lanka is an endemic for leptospirosis and  
30 outbreaks of the disease have been reported, this study aimed to determine the association  
31 between leptospirosis and chronic kidney disease in two geographically distinct regions of Sri Lanka,  
32 Badulla (CKDu endemic) and Kandy (CKDu non-endemic) districts.

33 Results

34 Eighty-five patients with CKDu and 149 controls from Badulla and 49 patients with CKD and 135  
35 controls from Kandy were serologically tested by microscopic agglutination test with a panel of 11  
36 *Leptospira* serogroups. The seroprevalence rates for leptospirosis were 7.1% and 13.4% in the CKDu  
37 and control groups, respectively, in Badulla and 2.1% and 18.5% in the CKD and control groups,  
38 respectively, in Kandy. There were no statistically significant differences between demographic  
39 characteristics and leptospirosis seropositivity in the CKD and control groups in either Badulla or  
40 Kandy.

41

42 **Keywords**

43 chronic kidney disease, chronic kidney disease of uncertain etiology, leptospirosis, Sri Lanka

44

45 **Introduction**

46 Chronic kidney disease (CKD) is a global public health problem primarily caused by due to diabetes  
47 and hypertension. CKD is defined as any condition that damages kidney tissue and results in a  
48 decrease in renal function with a glomerular filtration rate (GFR) of  $<60 \text{ mL/min/1.73 m}^2$  for  $\geq 3$   
49 months [1]. CKD that occurs in the absence of diabetes, hypertension, and other known risk factors  
50 is referred to as chronic kidney disease of uncertain etiology (CKDu) [2]. CKDu has been reported in  
51 Central America, Egypt, India, and Sri Lanka [3–6]. While several hypotheses are being explored to  
52 determine the causative agents/factors responsible for CKDu, one hypothesis that has been  
53 overlooked in Sri Lanka is an infectious etiology, such as hantavirus infection and leptospirosis [7].  
54 Previous studies have implicated leptospirosis as a possible etiological agent or risk factor for CKDu  
55 [7–10]. Leptospirosis is one of the most prevalent bacterial zoonoses worldwide and is caused by  
56 spirochetes of the genus *Leptospira* [7]. The kidney is the primary target organ of *Leptospira* spp. If  
57 left untreated, the bacteria can colonize the renal tubules of the kidney tissue [10]. Renal  
58 colonization by *Leptospira* spp. can lead to interstitial tubular nephritis and acute kidney injury (AKI),  
59 which carry a risk for CKD [10]. Long-term mild subclinical AKI may lead to the development of CKD  
60 [11]. In 2015, an association between CKD and leptospirosis was first suggested in Taiwan:  
61 participants exposed to *Leptospira* spp. showed a 2.5% decrease in estimated GFR and a higher  
62 percentage of CKD compared to those not exposed to the bacteria [12]. In the same study, 88  
63 individuals with high anti-leptospiral antibody titers were followed up for two years, and individuals  
64 with microscopic agglutination test (MAT) titers  $> 400$  showed a positive correlation with the kidney  
65 injury marker KIM-1/Cr [12]. In 2018, Yang presented two hypothetical pathways by which  
66 leptospirosis could progress to CKD: acute *Leptospira* infection could progress to chronic  
67 leptospirosis if left untreated, leading to the development of CKD, while subclinical *Leptospira*  
68 infection could lead to chronic leptospirosis that may progress to CKD [10]. Heat stress and  
69 dehydration have been postulated to have synergistic effects on these pathways [10]. Furthermore,  
70 there are several similarities between leptospirosis kidney disease and CKDu, such as

71 tubulointerstitial nephritis, interstitial fibrosis, non-proteinuria, proximal tubule dysfunction, and  
72 hypokalemia, and both diseases affect middle-aged men living in hot climates [10].

73 Although leptospirosis is an endemic and notifiable disease in Sri Lanka, it is still largely  
74 underdiagnosed and therefore most likely untreated, which can lead to a chronic state of infection  
75 without symptoms. The highest burden of CKDu occurs in the North Central Province (NCP), where  
76 leptospirosis outbreaks are also common [13, 14]. Since most of the CKDu affected population in the  
77 NCP are middle-aged men working in agriculture, it is possible that the renal tissue damage caused  
78 by *Leptospira* infection may progress to a chronic state due to incomplete recovery from mild AKI,  
79 recurrent exposure to *Leptospira* spp., and heat stress and dehydration. Therefore, this study  
80 investigated the involvement of leptospirosis as a causative agent or risk factor for CKD by  
81 comparing the seroprevalence of leptospirosis between chronic kidney disease patients and healthy  
82 controls in a CKDu endemic district, Badulla, and a CKDu non-endemic district, Kandy, Sri Lanka.

83

#### 84 **Main Text**

#### 85 **Methods**

#### 86 **Study design**

87 This is a hospital and community-based cross-sectional study with unmatched cases and controls.  
88 The study areas were Mahiyangana Divisional Secretariat, Badulla district, an endemic region of  
89 CKDu, and Yatinuwara Divisional Secretariat, Kandy district, a non-endemic region of CKDu, Sri  
90 Lanka.

91

#### 92 **Sample collection**

93 Sample collection was conducted between January 2017 and February 2018. Clinically diagnosed  
94 CKDu patients aged  $\geq 18$  years residing in Badulla (n=85) and CKD patients aged  $\geq 18$  years in Kandy  
95 (n=49) districts and attending the renal clinics of the Nephrology and Transplantation Unit,  
96 Girandurukotte District Hospital (Badulla) and Teaching Hospital Kandy (Kandy), respectively, were  
97 recruited as cases for the study. Individuals with a history of alcoholism were excluded from the  
98 study. For the control groups, the Medical Office of Health areas within the Badulla and Kandy  
99 districts were randomly selected. Individuals aged  $\geq 18$  years, residing in Badulla (n=149) and Kandy  
100 (n=135) districts, with no clinically diagnosed renal disease and normal serum creatinine levels (0.5–  
101 1.2 mg/dL) volunteered to participate in this study. Individuals with a history of either alcoholism or  
102 kidney disease were excluded from the study.

103 Five milliliters of blood were collected in sterile tubes without anticoagulant. The tubes were left  
104 undisturbed at room temperature for 30 min and centrifuged at  $2000\times g$  for serum separation.  
105 Serum separation was performed at the sample collection site and immediately transported in  
106 insulated coolers to the Department of Microbiology, Faculty of Medicine, University of Peradeniya,  
107 and serum samples were stored at  $-20^{\circ}\text{C}$  prior to analysis.

108 At the time of sample collection, demographic information was collected using a structured  
109 questionnaire. The questionnaire covered the following information: basic demographic data (age  
110 and sex), family and past medical history, occupational information, agricultural activity, and  
111 exposure to rodents.

112

### 113 **Detection of anti-leptospiral antibodies by MAT**

114 The MAT panel antigens used in this study were obtained from the Veterinary Research Institute and  
115 contained 12 serovars belonging to 11 serogroups: serogroup Autumnalis (serovar Autumnalis),  
116 Bataviae (Bataviae), Canicola (Canicola), Grippotyphosa (Grippotyphosa), Hebdomadis

117 (Hebdomadis), Javanica (Javanica), Panama (Panama), Sejroe (Hardjo and Wolffi), Semarang  
118 (Patoc), Shermani (Shermani), and Tarassovi (Tarassovi). The strains were maintained in a liquid  
119 Ellinghausen McCullough Johnson and Harris medium supplemented with *Leptospira* enrichment (BD  
120 Difco, USA) and 5-fluorouracil (final concentration of 200 µg/mL). Four- to seven-day-old cultures with  
121 growth equivalent to 0.5 McFarland (approximately  $1-2 \times 10^8$  organisms/mL) were used for MAT as  
122 previously described [15, 16]. A MAT titer of  $\geq 1:400$  was considered as positive for acute  
123 leptospirosis, as a titer of  $\geq 1:320$ , is considered clinically significant in Sri Lanka [17].

124

## 125 **Statistical analysis**

126 All statistical analyses were performed using the Statistical Package for the Social Sciences version 25  
127 (IBM, USA) and the online tool MedCalc (<https://www.medcalc.org/>). Exposure to *Leptospira* spp.  
128 and possible risk factors were evaluated by 2x2 Yate's corrected chi-square test or Fisher's exact  
129 test. A P value less than 0.05 was considered statistically significant. The odds ratio and associated  
130 95% confidence interval (CI) were calculated in the exposed group when compared with the non-  
131 exposed group for *Leptospira* spp.

132

## 133 **Results**

### 134 **Leptospirosis seroprevalence in Badulla and Kandy**

135 The seroprevalence rates in the CKDu and control groups in Badulla were 7.1% and 13.4%,  
136 respectively (Table 1). There was no statistically significant difference between the disease and  
137 control groups ( $p=0.14$ ). Seroprevalences of 2.0% and 18.5% for leptospirosis were observed in the  
138 CKD and control groups, respectively, in Kandy (Table 1). The seroprevalence in the CKD group was  
139 significantly lower than that in the control group ( $p=0.02$ ).

140 Table 1. Leptospirosis seropositivity between CKD patients and healthy individuals in Badulla and Kandy.

| District | Group         | No. of tested | No. of MAT positives (%) | Odds Ratio (95% CI) | P value |
|----------|---------------|---------------|--------------------------|---------------------|---------|
| Badulla  | CKDu patients | 85            | 6 (7.1)                  | 0.49 (0.19–1.27)    | 0.14    |
|          | Control       | 149           | 20 (13.4)                |                     |         |
| Kandy    | CKD patients  | 49            | 1 (2.0)                  | 0.09 (0.01–0.70)    | 0.02    |
|          | Control       | 135           | 25 (18.5)                |                     |         |



142

143 **Comparison of demographic characteristics and seropositivity in Badulla and Kandy**

144 There were no statistically significant differences in demographic characteristics and leptospirosis

145 seropositivity between the CKD and control groups in Badulla and Kandy (Table 2).

146 Table 2. Comparison of demographic characteristics and seropositivity in CKD patients and controls in Badulla and Kandy

|               | Badulla              |            |    |                |                    |            |    |                | Kandy               |            |    |                |                    |            |    |                |
|---------------|----------------------|------------|----|----------------|--------------------|------------|----|----------------|---------------------|------------|----|----------------|--------------------|------------|----|----------------|
|               | CKDu patients (n=85) |            |    |                | Controls (n=149)   |            |    |                | CKD patients (n=49) |            |    |                | Controls (n=135)   |            |    |                |
|               | No. of individuals   | No. of MAT |    | <i>P</i> value | No. of individuals | No. of MAT |    | <i>P</i> value | No. of individuals  | No. of MAT |    | <i>P</i> value | No. of individuals | No. of MAT |    | <i>P</i> value |
|               | (+)ve                | (-)ve      |    |                | (+)ve              | (-)ve      |    |                | (+)ve               | (-)ve      |    |                | (+)ve              | (-)ve      |    |                |
| <b>Age</b>    |                      |            |    |                |                    |            |    |                |                     |            |    |                |                    |            |    |                |
| >=50          | 62                   | 4          | 58 | 0.72           | 51                 | 5          | 46 | 0.50           | 26                  | 1          | 25 | 0.34           | 53                 | 11         | 42 | 0.76           |
| <50           | 23                   | 2          | 21 |                | 98                 | 15         | 83 |                | 23                  | 0          | 23 |                | 82                 | 14         | 68 |                |
| <b>Gender</b> |                      |            |    |                |                    |            |    |                |                     |            |    |                |                    |            |    |                |
| Male          | 57                   | 4          | 53 | 0.98           | 62                 | 10         | 52 | 0.57           | 27                  | 0          | 27 | 0.92           | 73                 | 10         | 63 | 0.18           |
| Female        | 28                   | 2          | 26 |                | 87                 | 10         | 77 |                | 22                  | 1          | 21 |                | 62                 | 15         | 47 |                |

Occupation

|             |    |   |    |      |    |    |    |      |    |   |    |      |     |    |     |      |
|-------------|----|---|----|------|----|----|----|------|----|---|----|------|-----|----|-----|------|
| Farming     | 75 | 6 | 69 | 0.79 | 72 | 13 | 59 | 0.17 | 3  | 0 | 3  | 0.80 | 10  | 1  | 9   | 0.77 |
| Non-farming | 10 | 0 | 10 |      | 77 | 7  | 70 |      | 46 | 1 | 45 |      | 125 | 24 | 101 |      |

Risk factors for CKD

|   |    |   |    |      |     |    |     |      |    |   |    |      |     |    |    |      |
|---|----|---|----|------|-----|----|-----|------|----|---|----|------|-----|----|----|------|
| + | 53 | 5 | 48 | 0.51 | 33  | 5  | 28  | 0.97 | 42 | 1 | 41 | 0.68 | 27  | 5  | 22 | 1.00 |
| - | 32 | 1 | 31 |      | 116 | 15 | 101 |      | 7  | 0 | 7  |      | 108 | 20 | 88 |      |

Exposure to  
agriculture

|     |    |   |    |      |     |    |    |      |    |   |    |      |     |    |    |      |
|-----|----|---|----|------|-----|----|----|------|----|---|----|------|-----|----|----|------|
| Yes | 80 | 6 | 74 | 0.53 | 113 | 15 | 98 | 0.93 | 13 | 0 | 13 | 0.54 | 26  | 4  | 22 | 0.86 |
| No  | 5  | 0 | 5  |      | 36  | 5  | 31 |      | 36 | 1 | 35 |      | 109 | 21 | 88 |      |

Storing crop at  
house

|     |    |   |    |      |     |    |    |      |   |   |   |      |    |   |    |      |
|-----|----|---|----|------|-----|----|----|------|---|---|---|------|----|---|----|------|
| Yes | 79 | 5 | 74 | 0.90 | 100 | 16 | 84 | 0.29 | 6 | 0 | 6 | 0.71 | 15 | 4 | 11 | 0.48 |
|-----|----|---|----|------|-----|----|----|------|---|---|---|------|----|---|----|------|

|    |   |   |   |  |    |   |    |  |    |   |    |  |     |    |    |
|----|---|---|---|--|----|---|----|--|----|---|----|--|-----|----|----|
| No | 6 | 1 | 5 |  | 49 | 4 | 45 |  | 43 | 1 | 42 |  | 120 | 21 | 99 |
|----|---|---|---|--|----|---|----|--|----|---|----|--|-----|----|----|

Rats seen at home  
or  
surroundings

|     |    |   |    |      |     |    |     |      |    |   |    |      |     |    |    |      |
|-----|----|---|----|------|-----|----|-----|------|----|---|----|------|-----|----|----|------|
| Yes | 66 | 5 | 61 | 0.73 | 123 | 19 | 104 | 0.21 | 32 | 1 | 31 | 0.46 | 103 | 20 | 83 | 0.82 |
|-----|----|---|----|------|-----|----|-----|------|----|---|----|------|-----|----|----|------|

|    |    |   |    |  |    |   |    |  |    |   |    |  |    |   |    |
|----|----|---|----|--|----|---|----|--|----|---|----|--|----|---|----|
| No | 19 | 1 | 18 |  | 26 | 1 | 25 |  | 17 | 0 | 17 |  | 32 | 5 | 27 |
|----|----|---|----|--|----|---|----|--|----|---|----|--|----|---|----|

Dried rodent feces  
seen at home or  
surrounding

|     |    |   |    |      |    |    |    |      |    |   |    |      |    |   |    |      |
|-----|----|---|----|------|----|----|----|------|----|---|----|------|----|---|----|------|
| Yes | 57 | 6 | 51 | 0.18 | 88 | 16 | 72 | 0.07 | 17 | 0 | 17 | 0.46 | 50 | 7 | 43 | 0.42 |
|-----|----|---|----|------|----|----|----|------|----|---|----|------|----|---|----|------|

|    |    |   |    |  |    |   |    |  |    |   |    |  |    |    |    |
|----|----|---|----|--|----|---|----|--|----|---|----|--|----|----|----|
| No | 28 | 0 | 28 |  | 61 | 4 | 57 |  | 32 | 1 | 31 |  | 85 | 18 | 67 |
|----|----|---|----|--|----|---|----|--|----|---|----|--|----|----|----|

148

149 **Infecting *Leptospira* serogroups in Badulla and Kandy**

150 Serogroup Sejroe was the predominant infecting serogroup in both Badulla and Kandy (Table 3).

151 Although a MAT titer  $\geq 1:400$  was considered positive for leptospiral antibody indicating acute

152 infection in this study, individuals with lower antibody titers were also observed (Supplementary

153 Table 1).

154 Table 3. Results of MAT in Badulla and Kandy

| Serogroup  | Badulla              |                      | Kandy                |                      |
|------------|----------------------|----------------------|----------------------|----------------------|
|            | CKDu Patients (n=85) | Controls (n=149)     | CKD Patients (n=49)  | Controls (n=135)     |
|            | No. of positives (%) | No. of positives (%) | No. of positives (%) | No. of positives (%) |
| Autumnalis | 1 (1.2)              | 1 (0.7)              | 0 (0)                | 1 (0.7)              |
| Bataviae   | 0 (0)                | 1 (0.7)              | 0 (0)                | 0 (0)                |
| Canicola   | 1 (1.2)              | 0 (0)                | 0 (0)                | 0 (0)                |
| Javanica   | 0 (0)                | 0 (0)                | 0 (0)                | 4 (3.0)              |
| Sejroe     | 4 (4.7)              | 18 (12.1)            | 1 (2)                | 17 (12.6)            |
| Semarang   | 0 (0)                | 0 (0)                | 0 (0)                | 3 (2.2)              |
| Total      | 6 (7.1)              | 20 (13.4)            | 1 (2.0)              | 25 (18.5)            |

156

## 157 **Discussion**

158 This study suggests that there is no association between CKD and leptospirosis seroprevalence. This  
159 finding is consistent with that of a recent study conducted in the NCP of Sri Lanka in 2020, where the  
160 difference in leptospirosis seroprevalence between the CKDu and control groups was not statistically  
161 significant [18]. On the other hand, these results contradict the findings of a study conducted in  
162 Taiwan, which showed an association between *Leptospira* seroprevalence and CKD and lower eGFR  
163 [12]. The cause of CKDu may vary regionally and be geographically specific. Epidemics of kidney  
164 disease of unknown etiology have previously been reported: Itai-itai disease and Balkan endemic  
165 nephropathy (BEN) are nephropathic epidemics whose etiology was identified much later. Itai-itai  
166 disease, which occurred in Japan in 1912, was found to be caused by cadmium poisoning in 1968,  
167 while BEN, which occurred in the 1950s, was found to be caused by aristocholic acid in 1993 [19].

168 This study showed that the predominant infecting *Leptospira* serogroup was Sejroe, of which serovar  
169 Hardjo was the most reactive serovar in both Badulla and Kandy (Table 3 and Supplementary Table  
170 1). Serovar Hardjo is known to be maintained by cattle and the transmission of this strain to humans  
171 often occurs through contact with cattle [20]. The high seroprevalence for serogroup Sejroe (serovar  
172 Hardjo) can be explained by the exposure of the population to agricultural activities with  
173 direct/indirect contact with cattle in Badulla (Table 2). However, a high seroprevalence for serogroup  
174 Sejroe (serovar Hardjo) was also observed in the Kandy population, although most of them were not  
175 involved in agriculture (Table 2). Hardjo infections in dogs and cats have been reported previously in  
176 Brazil, Croatia, Italy, Scotland, and the USA [21–27]. In addition, a previous serological study of  
177 companion dogs in Kandy district showed that Sejroe was the most prevalent serogroup [16].

178

## 179 **Limitations**

180 The CKD cohort in this study consisted of CKD and CKDu patients, whereas it would have been ideal  
181 to recruit only CKDu patients. Differentiation between CKDu and CKD patients is possible only by  
182 renal biopsy, an invasive procedure that is rarely performed in Sri Lanka. The antigen panel used for  
183 MAT was not composed of locally isolated strains. It has been shown that renal colonization with  
184 *Leptospira* spp. can occur asymptotically and sometimes in the absence of serological evidence  
185 [12, 28, 29]. To conclude that leptospirosis is not associated with CKD in Sri Lanka, renal colonization  
186 needs to be investigated.

187

### 188 **List of abbreviations**

189 AKI, acute kidney injury; CI, confidence interval; CKD, chronic kidney disease; CKDu, chronic kidney  
190 disease of uncertain etiology; GFR, glomerular filtration rate; MAT, microscopic agglutination test;  
191 NCP, North Central Province

192

### 193 **Declarations**

- 194 • Ethics approval and consent to participate

195 Ethical approval for this study was obtained from the institutional ethical review committee of the  
196 Faculty of Medicine, University of Peradeniya (2016/EC/64). The collection of blood samples and  
197 demographic data was approved by the Regional Director of Health Services, Kandy, and informed  
198 consent was obtained from all study participants via signature or thumbprints.

199

- 200 • Consent for publication

201 Not applicable

202



203 • Availability of data and materials

204 All data generated or analyzed during this study are included in this published article and its  
205 supplementary information file.

206

207 • Competing interests

208 The authors declare that they have no competing interests.

209

210 • Funding

211 This study was partly supported by a research grant from University of Peradeniya (URG/2018/28M),  
212 National Science Foundation of Sri Lanka (RPHS/2016/CKDu/06), and the Research Program on  
213 Emerging and Re-emerging Infectious Diseases (JP23fk0108683) from the Japan Agency for Medical  
214 Research and Development (AMED).

215

216 • Authors' contributions

217 Conceptualization: CDG; Investigation: RAF, PS; Formal analysis: RAF, CDG; Data curation: RAF, PS;  
218 Project administration: RAF, PS, NN, LG; Methodology: NK, CDG; Resources: KY, NK, CDG;  
219 Supervision: NK, CDG; Funding acquisition: NK, CDG; Writing - Original Draft: RAF; Writing - Review &  
220 Editing: RAF, PS, DSM, NN, LG, YK, NK, CDG

221

222 • Acknowledgments

223 We thank Athula Kumara and all the staff members of the Department of Microbiology, Faculty of  
224 Medicine, and Nishanthi Weerakoon and all the staff members of the Microbiology Division of the

225 Veterinary Research Institute, for their technical support. We also thank Yomani Sarathkumara for  
226 collecting samples and data.

227

## 228 **References**

- 229 1. Levey AS, Eckardt KU, Tsukamoto Y, Levin A, Coresh J, Rossert J, et al. Definition and  
230 classification of chronic kidney disease: A position statement from Kidney Disease: Improving  
231 Global Outcomes (KDIGO). *Kidney Int.* 2005;67:2089–100.
- 232 2. Weaver VM, Fadrowski JJ, Jaar BG. Global dimensions of chronic kidney disease of unknown  
233 etiology (CKDu): a modern era environmental and/or occupational nephropathy? *BMC Nephrol.*  
234 2015;16:145.
- 235 3. González-Quiroz M, Pearce N, Caplin B, Nitsch D. What do epidemiological studies tell us about  
236 chronic kidney disease of undetermined cause in Meso-America? A systematic review and  
237 meta-analysis. *Clin Kidney J.* 2018;11:496–506.
- 238 4. O’Callaghan-Gordo C, Shivashankar R, Anand S, Ghosh S, Glaser J, Gupta R, et al. Prevalence of  
239 and risk factors for chronic kidney disease of unknown aetiology in India: Secondary data  
240 analysis of three population-based cross-sectional studies. *BMJ Open.* 2019;9: e023353.
- 241 5. Ruwanpathirana T, Senanayake S, Gunawardana N, Munasinghe A, Ginige S, Gamage D, et al.  
242 Prevalence and risk factors for impaired kidney function in the district of Anuradhapura, Sri  
243 Lanka: a cross-sectional population-representative survey in those at risk of chronic kidney  
244 disease of unknown aetiology. *BMC Public Health.* 2019;19:763.
- 245 6. El Minshawy O. End-stage renal disease in the El-Minia Governorate, upper Egypt: an  
246 epidemiological study. *Saudi J Kidney Dis Transpl.* 2011;22:1048–54.
- 247 7. Gamage CD, Sarathkumara YD. Chronic kidney disease of uncertain etiology in Sri Lanka: Are  
248 leptospirosis and Hantaviral infection likely causes? *Med Hypotheses.* 2016;91:16–9.

- 249 8. Carrillo-Larco RM, Altez-Fernandez C, Acevedo-Rodriguez JG, Ortiz-Acha K, Ugarte-Gil C.  
250 Leptospirosis as a risk factor for chronic kidney disease: A systematic review of observational  
251 studies. PLoS Negl Trop Dis. 2019;13: e0007458.
- 252 9. Correa-Rotter R, Wesseling C, Johnson RJ. CKD of unknown origin in Central America: the case  
253 for a Mesoamerican nephropathy. Am J Kidney Dis. 2014;63:506–20.
- 254 10. Yang CW. Leptospirosis renal disease: emerging culprit of chronic kidney disease unknown  
255 etiology. Nephron. 2018;138:129–36.
- 256 11. Kupferman J, Ramírez-Rubio O, Amador JJ, López-Pilarte D, Wilker EH, Laws RL, et al. Acute  
257 kidney injury in sugarcane workers at risk for Mesoamerican nephropathy. Am J Kidney Dis.  
258 2018;72:475–82.
- 259 12. Yang HY, Hung CC, Liu SH, Guo YG, Chen YC, Ko YC, et al. Overlooked risk for chronic kidney  
260 disease after leptospiral infection: a population-based survey and epidemiological cohort  
261 evidence. PLoS Negl Trop Dis. 2015;9: e0004105.
- 262 13. Wanigasuriya K. Update on uncertain etiology of chronic kidney disease in Sri Lanka’s north-  
263 central dry zone. MEDICC Rev. 2014;16:61–5.
- 264 14. Agampodi SB, Dahanayaka NJ, Bandaranayaka AK, Perera M, Priyankara S, Weerawansa P, et al.  
265 Regional differences of leptospirosis in Sri Lanka: observations from a flood-associated outbreak  
266 in 2011. PLoS Negl Trop Dis. 2014;8: e2626.
- 267 15. Brandão AP, Camargo ED, da Silva ED, Silva MV, Abrão. Macroscopic agglutination test for rapid  
268 diagnosis of human leptospirosis. J Clin Microbiol. 1998;36: 3138–42.
- 269 16. Athapattu T, Fernando R, Abayawansa R, Fernando P, Fuward M, Samarakoon N, et al. Carrier  
270 status of *Leptospira* spp. in healthy companion dogs in Sri Lanka. Vector Borne Zoonotic Dis.  
271 2022;22:93–100.

- 272 17. Epidemiology Unit E, Ministry of Health N and IMSL. National guidelines on management of  
273 leptospirosis. Epidemiology Unit, Epidemiology Ministry of Health, Nutrition and Indigenous  
274 Medicine Sri Lanka. 2016.
- 275 18. Sunil-Chandra NP, Jayaweera JAAS, Kumbukgolla W, Jayasundara MVML. Association of  
276 hantavirus infections and leptospirosis with the occurrence of chronic kidney disease of  
277 uncertain etiology in the North Central Province of Sri Lanka: a prospective study with patients  
278 and healthy persons. *Front Cell Infect Microbiol.* 2020;10: 556737.
- 279 19. Gifford FJ, Gifford RM, Eddleston M, Dhaun N. Endemic nephropathy around the world. *Kidney*  
280 *Int Rep.* 2017;2:282–92.
- 281 20. White FH, Sutherland GE, Raynor LE, Cottrell CR, Sulzer KR. *Leptospira interrogans serovars*  
282 *hardjo* and *pomona*: causes of infections in dairy cows and humans in Florida. *Public Health*  
283 *Rep.* 1981;96:250-4.
- 284 21. Adin CA, Cowgill LD. Treatment and outcome of dogs with leptospirosis: 38 cases (1990-1098). *J*  
285 *Am Vet Med Assoc.* 2000;216:371–5.
- 286 22. Agunloye CA, Nash AS. Investigation of possible leptospiral infection in cats in Scotland. *J Small*  
287 *Anim Pract.* 1996;37:126–9.
- 288 23. Kikuti M, Langoni H, Nobrega DN, Corrêa APFL, Ullmann LS. Occurrence and risk factors  
289 associated with canine leptospirosis. *J Venom Anim Toxins Incl Trop Dis.* 2012;18:124–7.
- 290 24. Majetić ZŠ, Habuš J, Milas Z, Perko VM, Starešina V, Turk N. Serological survey of canine  
291 leptospirosis in Croatia - the changing epizootiology of the disease. *Vet Arh.* 2012;82:183–91.
- 292 25. Piredda I, Ponti MN, Piras A, Palmas B, Pintore P, Pedditzi A, et al. New insights on *Leptospira*  
293 infections in a canine population from north Sardinia, Italy: a sero-epidemiological study.  
294 *Biology.* 2021;10:507.

- 295 26. Rubanick J V., Fries RC, Waugh CE, Pashmakova MB. Severe hyperkalemia presenting with wide-  
296 complex tachycardia in a puppy with acute kidney injury secondary to leptospirosis. J Vet Emerg  
297 Crit Care. 2016;26:858–63.
- 298 27. Shropshire SB, Veir JK, Morris AK, Lappin MR. Evaluation of the *Leptospira* species microscopic  
299 agglutination test in experimentally vaccinated cats and *Leptospira* species seropositivity in  
300 aged azotemic client-owned cats. J Feline Med Surg. 2016;18:768–72.
- 301 28. Ganoza CA, Matthias MA, Saito M, Cespedes M, Gotuzzo E, Vinetz JM. Asymptomatic renal  
302 colonization of humans in the Peruvian Amazon by *Leptospira*. PLoS Negl Trop Dis. 2010;4:e612.
- 303 29. Sivasankari K, Shanmughapriya S, Natarajaseenivasan K. Leptospiral renal colonization status in  
304 asymptomatic rural population of Tiruchirapalli district, Tamilnadu, India. Pathog Glob Health.  
305 2016;110:209–15.
